# Supplementary material for: Detection of SARS-CoV-2 Delta Variant (B.1.617.2) in Domestic Dogs and Zoo Tigers in England and Jersey during 2021
Source: MDPI journal article supplement (doi:10.3390/v16040617), 2024-04-16
Supplement: s1 [file s1]

**Supplementary Table S1.** Assembled raw reads mapped to SARS-CoV-2/human/China/WIV04/2020 (GenBank Accession No: MN996528) as the reference sequence and deposited on NCBI Sequence Read Archive (SRA) under experiment accession number PRJNA1092720. The mapping statistics include the number of reads in the assembly, the percentage coverage of positions with at least one base aligned, the mean depth of coverage across the genome, the mean base quality score (Phred-scaled 0-40; the higher the quality score the more reliable the base call) and the mean mapping quality of the selected reads.

| Sequence name                           | Accession numbers<br>GISAID; GenBank;<br>NCBI SRA | Number<br>of<br>reads | Coverage<br>bases (%) | Mean<br>depth of<br>coverage | Mean<br>base<br>quality | Mean<br>mapping<br>quality |
|-----------------------------------------|---------------------------------------------------|-----------------------|-----------------------|------------------------------|-------------------------|----------------------------|
| SARS-CoV-2/dog/Jersey/M8-21-02/2021     | EPI_ISL_18943724;<br>PP515674;<br>SRX24081943     | 53687                 | 29714<br>(99.41%)     | 249.746                      | 35.2                    | 59.9                       |
| SARS-CoV-2/dog/England/M11-21-01/2021   | EPI_ISL_18943725;<br>PP515675;<br>SRX24081944     | 54654                 | 29842<br>(99.84%)     | 258.652                      | 38.4                    | 60.0                       |
| SARS-CoV-2/tiger/England/M12-21-01/2021 | EPI_ISL_18943726;<br>PP515676;<br>SRX24081945     | 58115                 | 29866<br>(99.92%)     | 276.85                       | 34.6                    | 59.7                       |
| SARS-CoV-2/tiger/England/M12-21-05/2021 | EPI_ISL_18943727;<br>PP515677;<br>SRX24081946     | 11677                 | 29129<br>(97.45%)     | 36.6328                      | 28.3                    | 55.1                       |
| SARS-CoV-2/tiger/England/M12-21-07/2021 | EPI_ISL_18943728;<br>PP515678;<br>SRX24081947     | 53543                 | 29667<br>(99.25%)     | 251.423                      | 34.4                    | 59.6                       |
| SARS-CoV-2/dog/England/M14-21-11/2021   | EPI_ISL_18943729;<br>PP515679;<br>SRX24081948     | 49844                 | 29493<br>(98.67%)     | 229.908                      | 33.8                    | 59.7                       |
